*Frontiers in cardiovascular medicine*

# Heart failure with preserved ejection fraction: pathophysiology, diagnosis, and treatment

**Barry A. Borlaug<sup>1\*</sup> and Walter J. Paulus<sup>2</sup>**<sup>1</sup>The Division of Cardiovascular Diseases, Department of Medicine, Mayo Clinic Rochester, MN 55906, USA; and <sup>2</sup>The VU University Medical Center, Amsterdam, The Netherlands

Received 9 July 2010; revised 8 September 2010; accepted 14 October 2010; online publish-ahead-of-print 7 December 2010

Half of patients with heart failure (HF) have a preserved left ventricular ejection fraction (HFpEF). Morbidity and mortality in HFpEF are similar to values observed in patients with HF and reduced EF, yet no effective treatment has been identified. While early research focused on the importance of diastolic dysfunction in the pathophysiology of HFpEF, recent studies have revealed that multiple non-diastolic abnormalities in cardiovascular function also contribute. Diagnosis of HFpEF is frequently challenging and relies upon careful clinical evaluation, echo-Doppler cardiography, and invasive haemodynamic assessment. In this review, the principal mechanisms, diagnostic approaches, and clinical trials are reviewed, along with a discussion of novel treatment strategies that are currently under investigation or hold promise for the future.

**Keywords**

Heart failure • Diastolic • Systolic • Ejection fraction • Preserved ejection fraction • Pathophysiology • Diagnosis • Treatment

## Introduction

Clinical interest in heart failure (HF) with preserved ejection fraction (HFpEF) emerged from the confluence of two research areas dealing, respectively, with diastolic left ventricular (LV) dysfunction in hypertrophied hearts and with LV remodelling after small myocardial infarctions. In the late seventies, the first studies appeared that showed diastolic LV dysfunction to importantly contribute to HF in hypertrophic cardiomyopathy,<sup>1,2</sup> aortic stenosis,<sup>2,3</sup> and hypertensive heart disease.<sup>4</sup> Shortly after this inroad from the small niche of diastolic LV dysfunction in hypertrophied hearts, HFpEF was also identified and addressed in studies, which were a 'by-product' of the large HF trials investigating the use of angiotensin converting enzyme inhibitors (ACEIs) in HF with reduced EF (HFrEF) and in post-infarct LV remodelling.<sup>5–7</sup> The HFpEF populations derived from the latter studies were, however, clearly different, as they consisted of patients with limited myocardial infarction at risk for unfavourable eccentric LV remodelling. This ambiguous origin of HFpEF contributed to the confusion surrounding HFpEF as a distinct diagnosis<sup>8–10</sup> and the neutral outcome of many large HFpEF trials.<sup>11,12</sup>

Cardiac hypertrophy indeed has little in common with limited myocardial infarction, and in both conditions, mechanisms driving LV remodelling are likely to be dissimilar and react differently to pharmacological treatment. Recently, stringent criteria have been proposed for the diagnosis of HFpEF consisting not only of signs or symptoms of fluid overload and a preserved LVEF but also of evidence of diastolic LV dysfunction.<sup>13,14</sup> This caused most HFpEF patients to currently present with a concentrically remodelled left ventricle because of arterial hypertension, obesity, and diabetes, without evidence of coronary artery disease. A low prevalence of coronary artery disease has indeed recently been proposed as a measure for correct patient enrolment in HFpEF trials.<sup>15</sup>

In the past, HFpEF was frequently referred to as 'diastolic' HF (DHF) in opposition to 'systolic' HF (SHF), which corresponded with HFrEF. Because diastolic LV dysfunction was not unique to HFpEF but also observed in patients with HFrEF, the term DHF was abandoned and replaced by HFpEF<sup>16,17</sup> or by HF with normal LVEF (HFnEF).<sup>17</sup> The terms HFpEF and HFnEF, however, also have their shortcomings. The notion of a preserved LVEF implies knowledge of a pre-existing EF, which is almost always absent, and

\* Corresponding author. Mayo Clinic and Foundation, 200 First Street SW, Rochester, MN 55905, USA. Tel: +1 507 284 4442, Fax: +1 507 266 0228, Email: borlaug.barry@mayo.edu

Published on behalf of the European Society of Cardiology. All rights reserved. © The Author 2010. For permissions please email: journals.permissions@oxfordjournals.org.

the exact range of a 'normal' LVEF is hard to define.<sup>18,19</sup> It is not established whether HFpEF and HFrEF represent distinct forms of HF or exist as part of one 'HF spectrum',<sup>13</sup> although the distinct patterns of chamber and myocellular remodelling observed coupled with disparate responses to medical therapies would all suggest that they are two discrete disease processes. Heart failure with preserved ejection fraction is currently observed in 50% of HF patients, and outcomes are similar to those seen in HFrEF.<sup>20</sup> The dismal prognosis is likely a reflection of the complex multisystem involvement characteristic of all HF, regardless of EF—including skeletal muscle and vascular dysfunction, pulmonary hypertension, renal failure, anaemia, and atrial fibrillation.<sup>21</sup> The prevalence of HFpEF relative to HFrEF is rising at an alarming rate of ~1% per year, thereby rapidly turning HFpEF into the most prevalent HF phenotype over the next decennium; yet in contrast to HFrEF, no improvements in outcome have been realized over the past two decades.<sup>20</sup> Despite these worrisome epidemiological trends, pathophysiological mechanisms underlying HFpEF and diagnostic or therapeutic strategies remain uncertain<sup>21,22</sup> and will therefore be addressed in the current review, which spans transatlantic views on this subject as part of the Frontiers in Cardiovascular Medicine Series of the European Heart Journal.

## Pathophysiology

The seminal studies on HFpEF explained HF in the presence of normal systolic LV performance by diastolic LV dysfunction, which consisted of prolonged isovolumic LV relaxation, slow LV filling, and increased diastolic LV stiffness.<sup>1–4</sup> With the advent of Doppler echocardiography, diastolic LV dysfunction could easily be appreciated from mitral or pulmonary vein flow velocity recordings.<sup>23</sup> Abnormal mitral flow velocity recordings suggestive of

diastolic LV dysfunction were, however, non-specific for HFpEF, as they also occurred in the elderly<sup>24</sup> and in patients with HFrEF.<sup>25</sup> The importance of diastolic LV dysfunction for HFpEF was recently reappraised by invasive studies, which showed uniform presence at rest of slow LV relaxation and elevated diastolic LV stiffness<sup>26</sup> and which demonstrated that elevated diastolic LV stiffness limited cardiac performance during atrial pacing and exercise.<sup>27,28</sup> This reappraisal was also evident from the recent issuing of guidelines for the diagnosis of diastolic LV dysfunction by both the European and American Echocardiography Associations.<sup>13,14</sup>

The reappraisal of diastolic LV dysfunction as an important mechanism underlying HFpEF does not imply that the latter represents the sole contributor to disease pathophysiology. Numerous other mechanisms have indeed recently been identified and play important roles. These include resting and exercise-exacerbated systolic dysfunction,<sup>29–35</sup> impaired ventricular–vascular coupling,<sup>33,34,36,37</sup> abnormal exercise-induced and flow mediated vasodilation,<sup>28,31–33</sup> chronotropic incompetence,<sup>31,33,34,38</sup> and pulmonary arterial hypertension.<sup>39,40</sup>

## Diastolic left ventricular dysfunction

In the absence of endocardial or pericardial disease, diastolic LV dysfunction results from increased myocardial stiffness. Two compartments within the myocardium regulate its diastolic stiffness. These compartments are the extracellular matrix and the cardiomyocytes. A stiffness change within one compartment is also transmitted to the other compartment via matricellular proteins (Figure 1).

### Extracellular matrix

Stiffness of the extracellular matrix is largely determined by collagen through regulation of its total amount, relative abundance

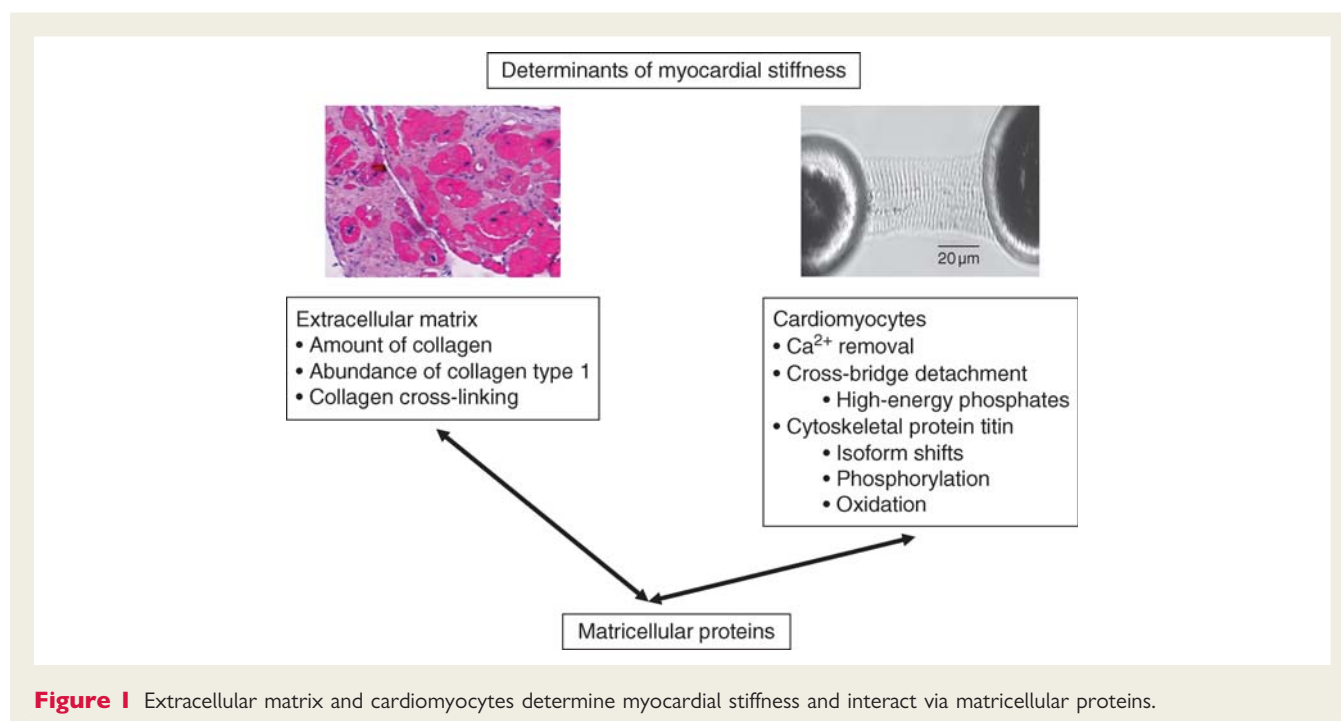

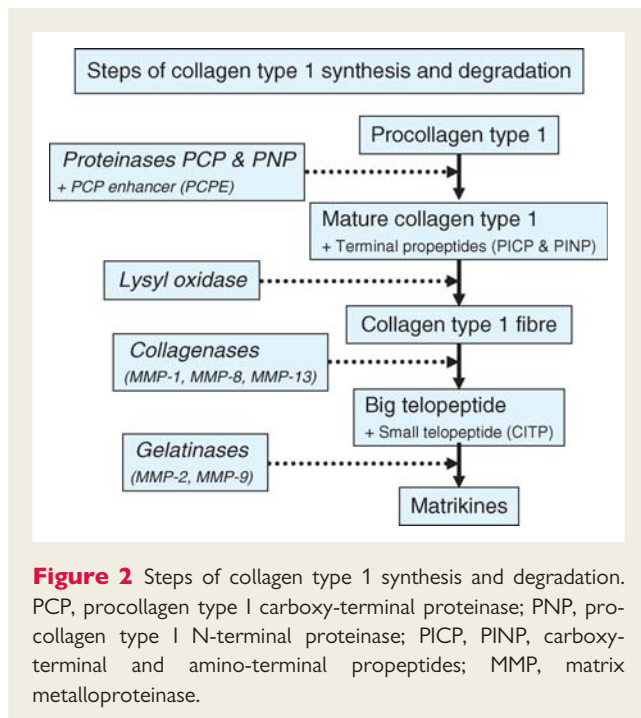

of collagen type I, and degree of collagen cross-linking. In HFpEF patients, all three mechanisms appear to be involved. Excessive collagen type I deposition results from an imbalance between an exaggerated synthesis and a depressed degradation.<sup>41</sup> Several steps are involved in the process of the collagen type I synthesis (Figure 2). Of clinical relevance is the observation that pro-collagen type I carboxy-terminal pro-peptide, which is cleaved by PCP from pro-collagen type I, is released into the bloodstream and therefore a potential biomarker of activity of the PCP-PCPE system.<sup>42,43</sup> Excessive collagen type I deposition can result not only from an exaggerated synthesis of collagen type I but also from a depressed collagen type I degradation. In hypertensive patients with HFpEF<sup>44</sup> and in patients with aortic stenosis,<sup>45</sup> there is decreased matrix degradation because of downregulation of matrix metalloproteinases (MMPs) and upregulation of tissue inhibitors of matrix metalloproteinases (TIMPs). Plasma levels of TIMP-1 have recently been proposed as a potential biomarker of HFpEF development in patients with arterial hypertension.<sup>46</sup> Conversely, in patients with dilated cardiomyopathy, there is increased matrix degradation because of upregulation of MMPs.<sup>47</sup> These distinct expression profiles of MMPs and TIMPs also correspond with unequal patterns of myocardial collagen deposition with mainly interstitial fibrosis in DHF and both replacement and interstitial fibrosis in dilated cardiomyopathy.<sup>48</sup> In patients with aortic stenosis, who develop a depressed LVEF, there is reversal of the balance between collagen antiproteolysis and proteolysis.<sup>49</sup>

### Cardiomyocytes

In LV endomyocardial biopsies, one-third of the patients presenting with HFpEF have a normal collagen volume fraction.<sup>50</sup> Their LVEDP, LV end-systolic wall stress, and LV stiffness modulus were, however, comparable with patients presenting with a

raised collagen volume fraction. This finding suggests that in addition to collagen deposition, intrinsic cardiomyocyte stiffness also contributes to diastolic LV dysfunction in HFpEF.<sup>50</sup> Intrinsic cardiomyocyte stiffness is indeed elevated in patients with HFpEF<sup>48,50,51</sup> and in patients with right or LV hypertrophy because of congenital heart disease.<sup>52</sup> This elevation of cardiomyocyte stiffness has been related to the cytoskeletal protein titin.

Titin is a giant elastic protein expressed in cardiomyocytes in two main isoforms, N2B (stiffer spring) and N2BA (more compliant spring).<sup>53</sup> Earlier work showed that the N2BA:N2B isoform expression ratio is increased in eccentrically remodelled explanted hearts from dilated cardiomyopathy patients when compared with control donor hearts.<sup>54–56</sup> Although titin-isoform switching is a confirmed mechanism for adjusting myocardial passive stiffness, recent studies suggested that the increased passive stiffness of failing myocardium can also arise from alterations in the phosphorylation state of titin<sup>57–59</sup> or from the oxidative stress-induced formation of disulfide bridges within the titin molecule.<sup>60</sup>

A characteristic feature of HFpEF is slow LV relaxation, which may reduce LV stroke volume, especially at high heart rates.<sup>61,62</sup> This finding is in contrast to the normal heart, which accelerates LV relaxation at high heart rates. Left ventricular relaxation is dependent on both cross-bridge detachment and sarcoplasmic reticular  $\text{Ca}^{2+}$  reuptake.<sup>63</sup> Nitric oxide (NO) signalling is involved as well. Its downstream mediator cyclic guanosine monophosphate (cGMP) reduces myofilamentary  $\text{Ca}^{2+}$  sensitivity and thereby facilitates cross-bridge detachment.<sup>64</sup> This involvement of NO was also recently reappraised because of close correlations between asymmetric dimethylarginine and diastolic LV dysfunction in failing human hearts<sup>65,66</sup> and because of uncoupling of NO synthase-1 inducing HFpEF in an animal model.<sup>67</sup> As cross-bridge detachment is an energy-consuming process, slow LV relaxation can also result from a myocardial energy deficit. Recent studies using myocardial phosphorus magnetic resonance spectroscopy indeed showed lower myocardial creatine phosphate/adenosine triphosphate ratio in HFpEF patients compared with normal controls,<sup>34,68</sup> consistent with reduced myocardial energy reserve.

### Matricellular proteins

The mechanosensitive induction of matricellular proteins affects fibroblast function and regulates cardiomyocyte hypertrophy and survival.<sup>69</sup> By binding to collagen, cell surface receptors, and MMPs, matricellular proteins improve both matrix quality and cardiomyocyte function.<sup>70</sup> Their role in HFpEF remains unexplored.

### Systolic dysfunction

Ejection fraction is preserved in HFpEF, but EF is more accurately regarded as a measure of ventricular–arterial coupling than contractility alone.<sup>30</sup> In 2002, two seminal studies reported that regional measures of systolic function, assessed by Tissue Doppler imaging, are impaired in HFpEF, despite a normal EF.<sup>29,71</sup> Numerous subsequent studies have similarly shown depressed longitudinal<sup>72,73</sup> and radial systolic function in HFpEF.<sup>74</sup> However, the significance of these abnormalities has been questioned,<sup>75</sup> because global measures of systolic function appeared preserved in HFpEF.<sup>76</sup> Recently, a large population-based study demonstrated that both the chamber level and myocardial

contractility are subtly but significantly depressed in HFpEF, compared with hypertensive and healthy controls.<sup>30</sup> Importantly, the extent of myocardial contractile dysfunction in HFpEF was associated with increased mortality, suggesting that it may be a mediator or nominally a marker of more severe disease.<sup>30</sup>

End-systolic elastance (Ees), defined by the slope and intercept of the end-systolic pressure–volume relationship, is a gold standard measure of chamber contractility that, in contrast to other measures, is elevated in HFpEF,<sup>30,36,76,77</sup> suggesting enhanced contractility. The coexistence of elevated Ees and reduced systolic function by other indices has been difficult to reconcile. However, in addition to being sensitive to contractility, Ees is also influenced by chamber geometry—being increased with concentric remodelling and passive ventricular stiffening—processes commonly observed in HFpEF. Ees is elevated in HFpEF despite depressed contractility, measured using other contractile indices, across each pattern of ventricular chamber geometry.<sup>30</sup> It is speculated that the same processes that promote diastolic ventricular stiffening in HFpEF also increase systolic stiffening (Ees) and contribute to reduced myocardial contractility and limited systolic reserve. Systolic function is clearly not as impaired in HFpEF as in HFrEF,<sup>73</sup> but recent studies have shown that even mild limitations in basal contractility in HFpEF may become more problematic in the setting of exercise stress,<sup>31–35</sup> where an inability to enhance contractility may be associated with impaired cardiac output reserve, more severe symptoms of exercise intolerance, and reduced aerobic capacity.

## Ventricular-arterial coupling and vascular dysfunction

Ventricular and vascular stiffening increase with ageing, hypertension, and diabetes, and are abnormally elevated in patients with HFpEF.<sup>20,77</sup> Reduced aortic distensibility in HFpEF is strongly associated with impaired exercise capacity.<sup>78</sup> Kawaguchi *et al.*<sup>36</sup> showed that both arterial elastance (Ea) and Ees are elevated in tandem in HFpEF, explaining the labile blood pressure swings commonly seen in HFpEF.<sup>79</sup> Combined ventricular-arterial stiffening leads to greater blood pressure lability, by creating a ‘high gain’ system—with amplified blood pressure changes for any alteration in preload or afterload (Figure 3).<sup>37</sup> Acute afterload elevation in the setting of ventricular-arterial stiffening causes greater increase in blood pressure, which may then feedback to further impair diastolic relaxation<sup>80,81</sup>—leading to dramatic increases in filling pressures during stress (Figure 4). Recent studies have also highlighted the importance of abnormal ventricular-arterial coupling during exercise in HFpEF<sup>33,34</sup>—where blunted increases in contractility and impaired reductions in arterial afterload with stress each contribute to exertional intolerance.<sup>82</sup> Therapies targeting combined ventricular-arterial stiffening improve exercise capacity in elderly hypertensive patients,<sup>83</sup> suggesting a possible role in HFpEF.

Systemic vasorelaxation with exercise is attenuated in HFpEF,<sup>31–33</sup> promoting impaired delivery of blood flow to skeletal muscle. Vascular dysfunction in HFpEF may be due in part to endothelial dysfunction, as a recent study demonstrated impaired flow-mediated

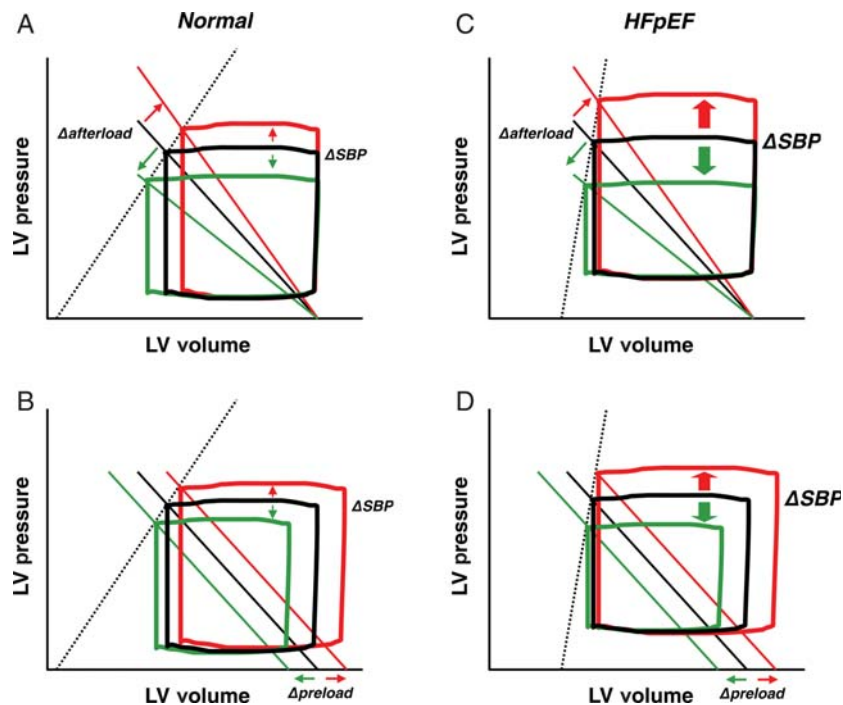

**Figure 3** Compared with normal controls (A and B), the slope of the end-systolic pressure–volume relationship (end-systolic elastance; Ees, dotted lines) is increased in heart failure with preserved ejection fraction (HFpEF) (C and D). This leads to exaggerated increases and decreases in blood pressure for the same change in afterload (A and C) or preload (B and D) in HFpEF, accounting for the greater predilection for hypertensive crisis and/or hypotension and azotemia with over-diuresis or overly vigorous vasodilation.



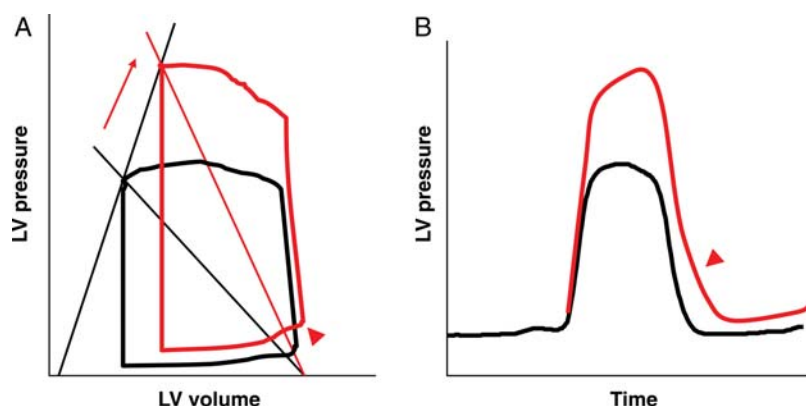

**Figure 4** (A) Combined ventricular–arterial stiffening in heart failure with preserved ejection fraction may lead to dramatic elevations in blood pressure with afterload increase (red arrow). This feeds back to increase LV end-diastolic pressures (arrowhead), by altering the slope or position of the diastolic pressure–volume relation, and/or (B) by prolonging LV pressure decay during isovolumic relaxation (arrowhead).

vasodilation in HFpEF compared with healthy age-matched controls.<sup>33</sup> Symptoms of dyspnoea and fatigue in HF may be related to pathologic ergoreflex activation, which is also related to NO bioavailability.<sup>84</sup> Intriguingly, the extent of flow-mediated vasodilation (a biomarker of endothelial function) is related to the severity of symptoms of effort intolerance during low-level exercise in HFpEF,<sup>33</sup> emphasizing the complex cross-talk between peripheral processes and perception of symptoms in HF.<sup>85</sup> These data provide further rationale for therapies targeting NO in HFpEF.

Vascular dysfunction is not confined to the systemic circulation in HFpEF, as pulmonary hypertension is frequently observed as well.<sup>40</sup> Among elderly patients with normal EF and high pulmonary artery pressure, HFpEF may be the most common aetiology.<sup>86</sup> Pulmonary pressures increase with ageing and are correlated with systemic vascular stiffening—both common risk factors for HFpEF.<sup>87</sup> Pulmonary hypertension in HFpEF appears to be due to both elevated left heart pressures and high pulmonary vascular resistance, which may develop in response to the former.<sup>40</sup> In early-stage HFpEF, pulmonary vasodilation with exercise is preserved, and exertional pulmonary hypertension is passive and secondary primarily to high left heart pressures.<sup>28</sup> Elevated pulmonary artery pressures predict increased mortality in HFpEF<sup>40</sup> and may represent a novel therapeutic target, although unbalanced pulmonary arterial vasodilation in such patients may lead to pathologic elevations in left heart pressures or even frank pulmonary oedema, and further study is required to define the possible role of pulmonary vasodilators in HFpEF.<sup>88</sup>

### Chronotropic incompetence and cardiovascular reserve dysfunction

Most patients with HF do not complain of symptoms at rest, but rather with physical exertion. A number of recent studies have highlighted the importance of abnormalities in cardiovascular reserve function with exercise stress in the pathophysiology of HFpEF.<sup>31–35,38</sup> During physical exertion, cardiac output increases

through integrated enhancements in venous return, contractility, heart rate, and peripheral vasodilation.<sup>89</sup> Abnormalities in each of these components of normal exercise reserve function have been identified in HFpEF and all may contribute to pathophysiology in individual patients (Figure 5).

Normal diastolic reserve with exercise allows the ventricle to fill to a larger preload volume, in a shorter amount of time, with no increase in filling pressures.<sup>90</sup> Indeed, the normal aged heart is more reliant upon enhanced preload reserve to compensate for age-related reductions in contractile and chronotropic reserve.<sup>91</sup> Just as diastolic function is impaired in HFpEF, diastolic reserve is also reduced—patients display blunted increases in preload volume with exertion, despite marked elevations in filling pressure.<sup>28,92</sup> This is likely related to increased chamber stiffness<sup>27</sup> and inadequate enhancement of early relaxation,<sup>61,62</sup> although pericardial restraint and enhanced ventricular interaction may also contribute.<sup>93</sup>

Systolic reserve with exercise is also impaired in HFpEF—with blunted increases in EF, contractility, and longitudinal systolic shortening velocities during exercise.<sup>31–35</sup> Exercise stress may ‘unmask’ mild deficits in resting systolic function, and the inability to reduce end-systolic volume, combined with less increase in end-diastolic volume, greatly limits stroke volume responses during exercise. The causes of systolic and diastolic reserve dysfunction in HFpEF remain unclear, but may be related to myocardial ischaemia (epicardial/microvascular coronary disease or vascular rarefaction), impaired  $\beta$ -adrenergic signalling,<sup>94</sup> myocardial energetics,<sup>34,68</sup> or abnormal calcium handling.<sup>95</sup>

Chronotropic reserve is depressed in HFpEF,<sup>31,33,34,38,96</sup> even compared with older, age-matched controls and independent of rate-slowing medication use. Similar to HFrEF,<sup>97</sup> this is likely related to downstream deficits in  $\beta$ -adrenergic stimulation, because the increase in plasma catecholamines with exercise is similar in HFpEF and healthy controls.<sup>31</sup> Autonomic dysfunction may contribute to chronotropic incompetence, as baroreflex sensitivity<sup>31</sup> is reduced and heart rate recovery impaired in HFpEF.<sup>31,96</sup>

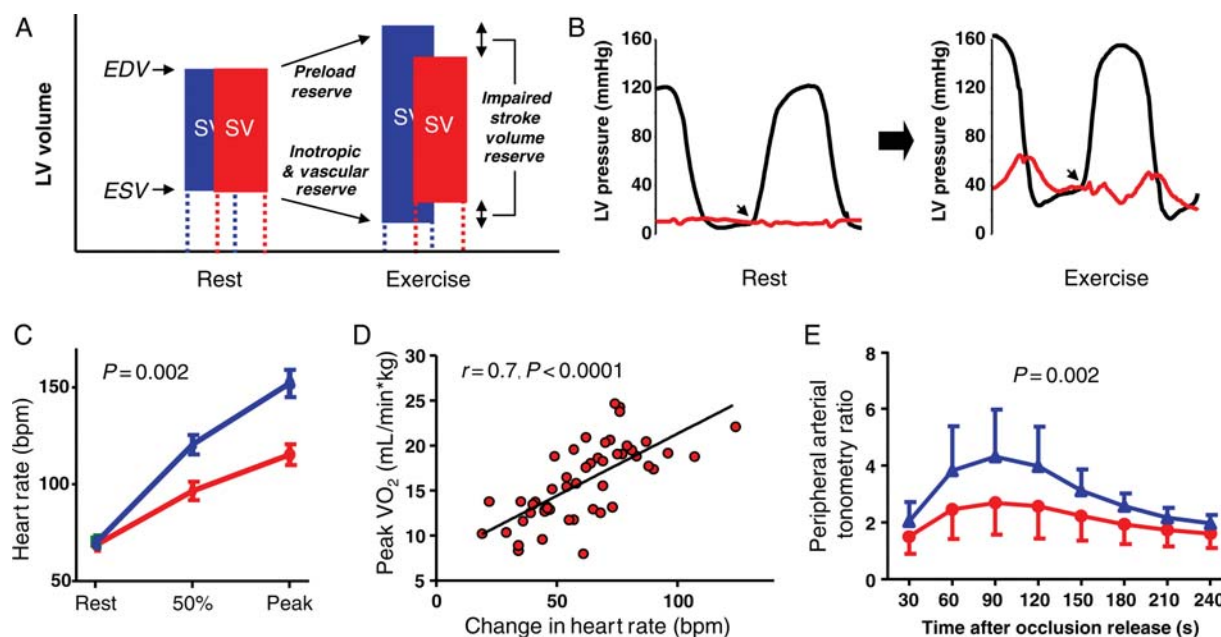

**Figure 5** (A) Chamber volumes and EF are similar at rest in heart failure (HF) with preserved ejection fraction (HFpEF) (red) and controls (blue), but HFpEF patients are less able to enhance preload volume (end-diastolic volume, EDV) and also contract to as low an end-systolic volume (ESV) during exercise stress. These impairments are related to diastolic, systolic, and vasodilator reserve dysfunction, which contribute to impaired stroke volume (SV) responses with exercise in HFpEF. (B) Despite less enhancement of EDV with exercise, there is a much larger increase in LV filling pressures, measured as LV end-diastolic pressure (arrow) or pulmonary wedge pressure (red). (C) Chronotropic response during submaximal and peak workload is impaired in HFpEF (red) compared with controls (blue) and the extent of chronotropic impairment is associated with more severely depressed aerobic capacity (D). Peripheral vascular function is also impaired in HFpEF, which may be related to impaired endothelium-dependent vasodilation, measured as the increase in peripheral arterial blood flow after upper arm cuff occlusion (E). These figures were created based upon previously published data in Borlaug *et al.*<sup>28,33</sup>

Patients with HFpEF display attenuated exercise-mediated reductions in mean vascular resistance and arterial elastance, coupled with abnormalities in endothelial function and dynamic ventricular–arterial coupling.<sup>31–33</sup> Many of these abnormalities are noted with normal ageing and are simply more markedly abnormal in HFpEF, consistent with the notion that HFpEF develops as a progressive and pathologic form of exaggerated hypertensive ageing.<sup>82</sup> Patients with HFpEF are more likely to display a greater number of discrete individual abnormalities in ventricular–vascular reserve, and recent evidence suggests that acquisition of a sufficient number of individual abnormalities in reserve promotes the transition from asymptomatic hypertensive diastolic dysfunction to symptomatic HFpEF.<sup>33</sup> In this way, HFpEF may be conceived as a fundamental disorder of cardiovascular reserve function—diastolic, systolic, chronotropic, and vascular. Future research is required to determine how these abnormalities may be effectively treated.

## Diagnosis

### Diagnostic algorithms

In contrast to HFrEF, the diagnosis of HFpEF is cumbersome, especially in patients presenting in an out-patient clinic with

exertional dyspnoea and multiple comorbidities but without obvious physical signs of fluid overload. To avoid a low specificity when diagnosing HFpEF, exertional dyspnoea and a normal LVEF need to be coupled with objective measures of diastolic LV dysfunction, LV hypertrophy, left atrial (LA) enlargement, or plasma levels of natriuretic peptides (NP), as recommended by all hitherto published guidelines for the diagnosis of HFpEF.

Four sets of guidelines for the diagnosis of HFpEF have so far been published.<sup>13,98–100</sup> They all require the simultaneous and obligatory presence of signs and/or symptoms of HF, evidence of normal systolic LV function, and evidence of diastolic LV dysfunction or of surrogate markers of diastolic LV dysfunction such as LV hypertrophy, LA enlargement, atrial fibrillation, or elevated plasma NP levels. The first set of guidelines was provided by the Working Group on Myocardial Function of the European Society of Cardiology.<sup>98</sup> A second set of guidelines was provided by the NHLBI Framingham Heart Study and combined signs and symptoms of HF, normal LVEF (>50%), and invasive evidence of diastolic LV dysfunction.<sup>99</sup> A third set of guidelines was proposed by Yturralde and Gaasch from the Lahey Clinic.<sup>100</sup> They implement their assessment with a scoring system of major and minor criteria and use LV hypertrophy and LA enlargement as surrogate markers of diastolic LV dysfunction. Finally, the last set of guidelines was provided by the Heart Failure and Echocardiography Associations

of the European Society of Cardiology.<sup>13</sup> In accordance to this last set of guidelines, the diagnosis of HFpEF required signs or symptoms of HF, a LVEF >50%, a LVEDVI <97 mL/m<sup>2</sup>, and evidence of diastolic LV dysfunction. LVEDP >16 mmHg, PCW >12 mmHg and/or E/E' >15 provided stand-alone evidence of diastolic LV dysfunction, whereas NP always needed to be associated with an E/E' >8, a mitral flow velocity Doppler signal showing a E/A ratio <0.5 + deceleration time (DT) >280 ms, a pulmonary vein flow velocity signal showing a Ard-Ad >30 ms (Ard: duration of reverse pulmonary vein atrial systole flow; Ad: duration of mitral valve atrial wave flow), a LA size >40 mL/m<sup>2</sup>, or a LV mass >149 g/m<sup>2</sup> (men) or >122 g/m<sup>2</sup> (women).

Validation of these diagnostic guidelines for HFpEF is urgently needed.<sup>101</sup> Valuable validation efforts of the last set of guidelines provided by the Heart Failure and Echocardiography Associations of the European Society of Cardiology have to some extent been addressed, including: (i) the diagnostic value of E/E' against a LV stiffness modulus calculated from multiple LV end-diastolic pressure–volume points observed during balloon caval occlusion;<sup>102</sup> (ii) the diagnostic value of LA size >40 mL/m<sup>2</sup>, LV mass >149 g/m<sup>2</sup> (men) or >122 g/m<sup>2</sup> (women), Ard-Ad >30 ms, and E/A ratio <0.5 + DT >280 ms against E/E';<sup>103</sup> (iii) the diagnostic value of NTproBNP >220 pg/mL against E/E'.<sup>104</sup> In contrast to recent critiques on the validity of E/E' as a measure of LV filling pressures in acutely decompensated HFrEF patients,<sup>105</sup> a direct comparison of E/E' against conductance catheter-derived diastolic LV stiffness moduli yielded a 83% sensitivity, a 92% specificity, and an area under the ROC curve of 0.907 for E/E' >8 as a measure of high-stiffness modulus in HFpEF patients.<sup>102</sup> These findings suggested E/E' >8 may be able to provide stand-alone evidence of diastolic LV dysfunction without further need of serial non-invasive tests in patients presenting with a 8 < E/E' < 15.<sup>106</sup> Early diastolic LV load, which is high in HFrEF but normal in HFpEF, may account for the dissimilar value of E/E' as a measure of LV filling pressures in HFrEF and HFpEF.<sup>107</sup> A direct comparison between the diagnostic values of E/E' and mitral or pulmonary flow velocity-derived indices showed the latter to be unreliable for the diagnosis of diastolic LV dysfunction.<sup>103</sup> In contrast, however, LA size >40 mL/m<sup>2</sup> provided both a high sensitivity and a high specificity to detect E/E' >15. Left ventricular mass >149 g/m<sup>2</sup> (men) or >122 g/m<sup>2</sup> (women) provided a low sensitivity but a high specificity for E/E' >15.<sup>103</sup> Finally, the diagnostic value of NTproBNP >220 pg/mL is currently being evaluated against E/E' in the Aldo-DHF trial.<sup>104</sup> In analogy to LV mass indices, it is expected to have a low sensitivity but a high specificity for the TDI diagnosis of HFpEF.

## Role of exercise testing

Heart failure with reduced EF is characterized by chamber dilation and reduced EF—both readily detectable by echocardiography. In HFpEF, chamber size and EF are normal, and the principal haemodynamic derangement is an elevation in filling pressures.<sup>26</sup> When pressures are high and congestion is present at rest, HFpEF is readily diagnosed based upon history, physical examination, radiography, NP levels, and echocardiography.<sup>13</sup> However, many patients with early-stage HFpEF have significant symptoms of exertional intolerance in the absence of apparent volume overload.

Invasive assessment in some patients may reveal pathologic elevation in filling pressures that had not been previously suspected,<sup>108</sup> and a recent study found that even among patients with normal exam, echocardiography, NP, and normal resting haemodynamics, many patients may still develop pathologic elevations in filling pressures characteristic of HFpEF during the stress of exercise.<sup>28</sup> The diagnosis of HFpEF could only be made using exercise haemodynamic evaluation in such patients, although an abnormal increase in left heart pressures with leg raise (a marker of reduced diastolic reserve) was also a strong predictor of HFpEF. Pulmonary artery pressures track very closely with left heart filling pressures in early-stage HFpEF,<sup>28</sup> suggesting that if the former could be accurately estimated by echocardiography during exercise, this may serve as a useful non-invasive screen among patients with normal EF and exertional dyspnoea.

The E/E' ratio is a cornerstone in the non-invasive evaluation of diastolic function at rest,<sup>13,14</sup> and some groups have begun to apply TDI-based evaluations during exercise, with early studies showing reasonable correlations with invasive measures.<sup>109</sup> However, E/E' may be less robust in the setting of tachycardia, hyperventilation, and fusion of early and late transmitral filling velocities, as the variability in both numerator and denominator will be summed. The role of non-invasive diastolic stress testing in the evaluation of early HFpEF merits further study and validation, but at this time invasive evaluation provides more reliable diagnostic information. In patients who do not meet established criteria for positive diagnosis of HFpEF<sup>13</sup> but in whom there is reasonably strong clinical suspicion, invasive evaluation should be strongly considered, with exercise stress if available and resting measurements are unremarkable.<sup>28</sup>

## Treatment

### Trial data

An extensive overview of all HFpEF trials performed so far was recently published.<sup>22</sup> Diverging efficacy of comparable pharmacological agents in HFrEF and HFpEF was evident for ACEIs, angiotensin receptor blockers (ARB), beta-blockers, and statins (Figure 6). The PEP-CHF study was the first major randomized controlled trial on the use of ACEI in HFpEF patients.<sup>110</sup> It compared perindopril 4 mg daily to placebo in elderly patients (≥70 years old) with a diagnosis of HF, LVEF >40%, minimal impairment of segmental LV wall motion, echocardiographic evidence of LA dilatation or LV hypertrophy, and abnormal LV filling kinetics on mitral flow velocity Doppler. The results of the PEP-CHF study contrasted sharply with earlier reports on the use of ACEI in HFrEF,<sup>111</sup> as it showed no overall difference in mortality and or need for HF hospitalizations. A neutral outcome in HFpEF and a positive outcome in HFrEF were also repeatedly observed for ARBs. The first major trial investigating cardiovascular mortality and HF hospitalizations in HFpEF was the CHARM-preserved trial, which randomized 3023 patients between candesartan and placebo.<sup>11</sup> CHARM-preserved failed to demonstrate a significant effect on cardiovascular death but observed fewer HF hospitalizations in the candesartan-treated patients. I-PRESERVE was so far the largest reported trial for HFpEF as it enrolled 4128 patients and randomly

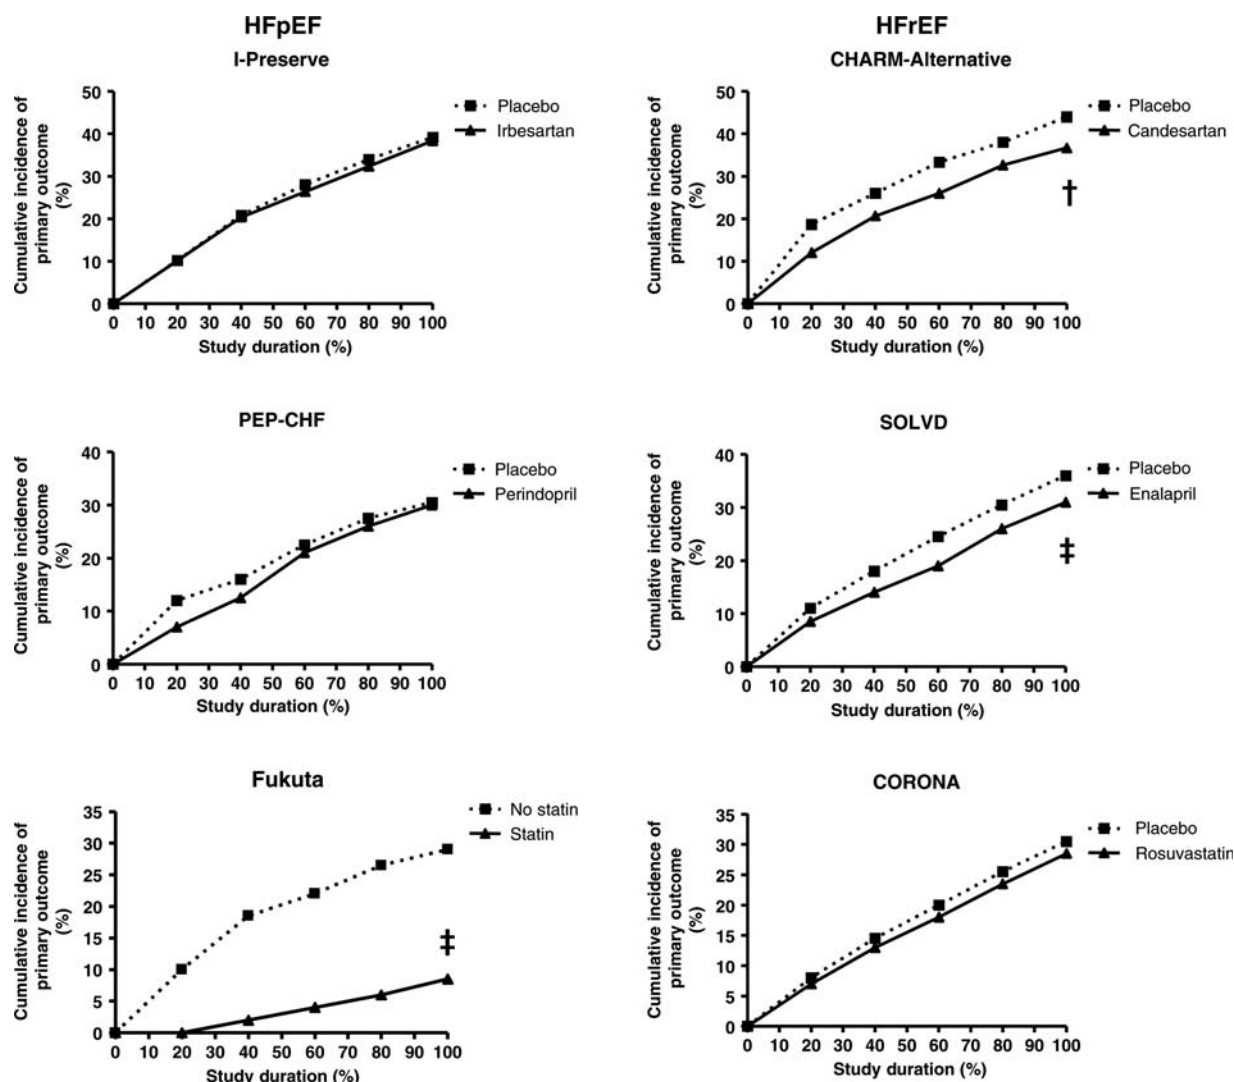

**Figure 6** Contrasting outcomes of trials using similar compounds in HFpEF and HFrEF. For ARB and ACEI, a neutral outcome is observed in HFpEF but a positive in HFrEF. Conversely, for statins, a positive outcome is observed in HFrEF but a neutral in HFpEF.  $^{\dagger}P < 0.0001$ ;  $^{\ddagger}P < 0.01$ .

assigned them to irbesartan or placebo.<sup>12</sup> Mortality or rates of hospitalizations for cardiovascular causes were again not improved by treatment with an ARB. Outcomes of both CHARM-preserved and I-PRESERVE are at odds with the positive results of the CHARM-Alternative trial,<sup>112</sup> which assigned ACEI-intolerant HFrEF patients to the ARB candesartan or placebo.

Some information on the outcome of chronic use of beta-blockers is available in the OPTIMIZE-HF registry, which contains both HFrEF and HFpEF patients. In the OPTIMIZE-HF registry,<sup>113</sup> discharge use of beta-blockers exerted no effect on 1 year mortality or hospitalization rates of HFpEF patients, but significantly improved both endpoints in HFrEF patients. Finally, the reverse situation with a positive outcome in HFpEF and a neutral outcome in HFrEF has also been observed. A preliminary report suggested statin therapy to be beneficial in HFpEF<sup>114</sup> with lower mortality rates. This positive outcome of statin therapy in HFpEF

patients contrasted with the recently reported neutral outcome of statin therapy in the HFrEF patients of the CORONA trial.<sup>115</sup> A neutral outcome in HFpEF compared with a positive outcome in HFrEF, as occurred with ACEIs, ARBs, and beta-blockers, could be compatible with flawed HFpEF trial design, but a positive outcome in HFpEF compared with a neutral outcome in HFrEF, as occurred with statins, can no longer be attributed to trial conception but supports different signal transduction cascades driving myocardial remodelling in HFpEF and HFrEF.<sup>22</sup>

## Novel therapies

Recent advances in pathophysiologic understanding of HFpEF have suggested roles for novel treatment strategies. Among the most exciting are agents that enhance cellular cGMP signalling.<sup>116</sup> Natriuretic peptides and NO both increase cGMP synthesis, activating cGMP-dependent protein kinases (PKG). Several



key transcription factors and sarcomeric proteins involved in hypertrophy signalling, diastolic relaxation and stiffness, and vasorelaxation are modified favourably by PKG-dependent phosphorylation, suggesting these agents may be beneficial in HFpEF.<sup>57,58,64,116,117</sup>

Phosphodiesterase 5 inhibitors (PDE5I) increase cGMP levels by blocking their catabolism. PDE5I attenuate adrenergic stimulation,<sup>118</sup> reduce ventricular–vascular stiffening,<sup>119</sup> antagonize maladaptive chamber remodelling,<sup>117</sup> improve endothelial function,<sup>120</sup> reduce pulmonary vascular resistance,<sup>121</sup> and may enhance renal responsiveness to NP.<sup>122</sup> The PDE5I sildenafil is currently being tested in the ongoing RELAX trial,<sup>123</sup> which will evaluate the effects of PDE5I on exercise capacity, functional status, and ventricular form and function.

Uncoupling of nitric oxide synthase (NOS) has emerged as an important contributor to pathologic concentric chamber remodelling and diastolic dysfunction in animal models of HF, in addition to promoting endothelial dysfunction.<sup>67,124</sup> Nitric oxide synthase uncoupling is due in part to oxidative depletion of its cofactor, tetrahydrobiopterin (BH4). Pre-clinical studies have shown that administration of BH4 in animal models reduces pressure-overload hypertrophy, fibrosis, NOS uncoupling, and oxidative stress, while improving systolic and diastolic function.<sup>67,124</sup> Enhancement of cGMP function with NP<sup>125</sup> or nitroglycerin<sup>126</sup> also may mitigate pathologic increases in LV filling pressures during exercise.

Aldosterone plays an important role in the pathogenesis of vascular stiffening and endothelial dysfunction.<sup>127</sup> A preliminary open label, non-placebo controlled study documented improvements in exercise capacity and the E/E' ratio in HFpEF patients treated with spironolactone,<sup>128</sup> and aldosterone antagonists are currently being actively investigated for HFpEF in the USA and Europe. Rho-kinase inhibitors such as fasudil and Y-27632 have vasorelaxation properties and have demonstrated the ability to blunt progression of hypertrophic remodelling in animal models of HF.<sup>129</sup> Intriguingly, 3-hydroxymethylglutaryl-coenzyme A reductase inhibitors (statins) also inhibit rho-kinase signalling, and a case series reported that statin use was associated with the improved outcome in HFpEF, whereas other conventional HF therapies such as ACEI or BB were not.<sup>114</sup>

Negative chronotropic medications have traditionally been recommended in HFpEF to increase the diastolic filling period, but slowing the rate in the absence of tachycardia tends to only prolong diastasis, where transmitral flow is minimal or absent.<sup>130</sup> More importantly, recent studies have repeatedly shown that chronotropic incompetence is highly prevalent and associated with exercise disability in HFpEF.<sup>31,33,38,96</sup> Indeed, in the setting of reduced systolic and diastolic reserve, chronotropic reserve may represent the only mechanism to augment cardiac output during exercise, although there is concern that inadequate ability to enhance relaxation with tachycardia may limit stroke volume responses.<sup>27,61,62</sup> These questions require further study. The effect of rate adaptive atrial pacing in HFpEF was being evaluated in the RESET trial,<sup>131</sup> but enrolment was below goal and the study has since been terminated by the sponsor. In contrast, another trial is testing the efficacy of the If channel blocker ivabradine in HFpEF,<sup>132</sup> an agent that slows heart rate. The role of beta-

blockade remains unresolved. The SENIORS trial suggested benefit in HF regardless of EF,<sup>133</sup> but there was not a large number of patients with truly 'normal' EF (>50–55%). Autonomic dysfunction is prevalent in HFpEF,<sup>31</sup> and enhancement in parasympathetic tone via carotid sinus stimulation has been proposed as a treatment,<sup>134</sup> but data are not available. Dyssynchrony is common in HFpEF,<sup>135</sup> but in contrast to HFrEF, electrical conduction delay is not,<sup>136,137</sup> and it remains unknown whether resynchronization therapy may play a role in HFpEF.

The macromolecule titin is the principal determinant of passive cardiomyocyte tension.<sup>138</sup> As discussed, the stiffness of titin may be modified based upon the expression of alternative isoforms,<sup>55,56,139</sup> but recent studies have produced great enthusiasm that acute modification of titin PKG phosphorylation sites may dynamically modulate titin stiffness.<sup>57–59</sup> Chamber stiffness is also altered by the extracellular matrix—including both quantitative and qualitative changes in collagen. Alagebrium chloride (ALT-711) is a novel compound that breaks glucose cross-links and improves ventricular and arterial compliance in animals<sup>140</sup> and reduces blood pressure and vascular stiffness in human hypertension.<sup>141</sup> A small open-label study found that ALT-711 was associated with reduced LV mass and improved diastolic filling.<sup>142</sup> Transforming growth factor-beta (TGF- $\beta$ ) is a pro-fibrotic cytokine, and infusion of TGF- $\beta$  neutralizing antibody in a rat model of pressure overload was found to reduce fibrosis and development of diastolic dysfunction.<sup>143</sup> New advances in cardiac MRI now allow visualization and quantification of myocardial fibrosis associated with diastolic dysfunction,<sup>144</sup> providing a potential outcome measure in therapeutic trials targeting fibrosis.

Systolic and diastolic reserve dysfunction in HFpEF may be related to abnormalities in cardiomyocyte energy availability or utilization.<sup>31,34,92</sup> Smith *et al.*<sup>68</sup> demonstrated abnormal ATP phosphocreatine shuttle kinetics in HFpEF, and similar results were recently reported by Phan *et al.*<sup>34</sup> Novel therapies targeting energy substrate utilization are currently under active investigation.<sup>145</sup> The anti-anginal drug ranolazine blocks inward sodium current, thereby reducing intracellular calcium, and it has also been suggested as a potential treatment for HFpEF,<sup>146</sup> although human HFpEF data are currently unavailable.

## Conclusions

Heart failure with preserved ejection fraction is a major and growing public health problem in Europe and the USA, currently representing half of all patients with HF. Despite improvements in disease understanding, there are no treatments of proven benefit. Advances in diagnostic algorithms, imaging, and invasive assessment will allow for more accurate and earlier diagnosis, so that therapies may be implemented earlier in disease progression, where potential for benefit may be higher. While important advances have been made in our understanding of the haemodynamic and cellular pathophysiology of diastolic and non-diastolic mechanisms of disease, further research is urgently required to determine how to better target these abnormalities to reduce the substantial burden of morbidity and mortality in this form of HF, which is reaching epidemic proportions.

## Funding

B.A.B. is supported by a grant from the Mayo Clinic Center for Translational Science Activities and the NIH (UL RR024150) and the Marie Ingalls Career Development Award in Cardiovascular Research. W.J.P. is the recipient and coordinator of a European Commission, Research Directorate General, FP7-Health-2010 grant on diastolic heart failure (261409—MEDIA).

**Conflict of interest:** none declared.

## References

- Sanderson JE, Gibson DG, Brown DJ, Goodwin JF. Left ventricular filling in hypertrophic cardiomyopathy. An angiographic study. *Br Heart J* 1977;**39**: 661–670.
- Hanrath P, Mathey DG, Siegert R, Bleifeld W. Left ventricular relaxation and filling pattern in different forms of left ventricular hypertrophy: an echocardiographic study. *Am J Cardiol* 1980;**45**:15–23.
- Hess OM, Grimm J, Krayenbuehl HP. Diastolic simple elastic and viscoelastic properties of the left ventricle in man. *Circulation* 1979;**59**:1178–1187.
- Soufer R, Wohlgeleitner D, Vita NA, Amuchestegui M, Sostman HD, Berger HJ, Zaret BL. Intact systolic left ventricular function in clinical congestive heart failure. *Am J Cardiol* 1985;**55**:1032–1036.
- Aronow WS, Kronzon I. Effect of enalapril on congestive heart failure treated with diuretics in elderly patients with prior myocardial infarction and normal left ventricular ejection fraction. *Am J Cardiol* 1993;**71**:602–604.
- Carson P, Johnson G, Fletcher R, Cohn J. Mild systolic dysfunction in heart failure (left ventricular ejection fraction >35%): baseline characteristics, prognosis and response to therapy in the Vasodilator in Heart Failure Trials (V-HeFT). *J Am Coll Cardiol* 1996;**27**:642–649.
- Aronow WS, Ahn C, Kronzon I. Effect of propranolol vs. no propranolol on total mortality plus nonfatal myocardial infarction in older patients with prior myocardial infarction, congestive heart failure, and left ventricular ejection fraction > or = 40% treated with diuretics plus angiotensin-converting enzyme inhibitors. *Am J Cardiol* 1997;**80**:207–209.
- Petrie MC, Caruana L, Berry C, McMurray JJ. "Diastolic heart failure" or heart failure caused by subtle left ventricular systolic dysfunction? *Heart* 2002;**87**: 29–31.
- Heusch G. Diastolic heart failure: a misNOMer. *Basic Res Cardiol* 2009;**104**: 465–467.
- De Keulenaer GW, Brutsaert DL. The heart failure spectrum: time for a phenotype-oriented approach. *Circulation* 2009;**119**:3044–3046.
- Yusuf S, Pfeffer MA, Swedberg K, Granger CB, Held P, McMurray JJ, Michelson EL, Olofsson B, Ostergren J. Effects of candesartan in patients with chronic heart failure and preserved left-ventricular ejection fraction: the CHARM-Preserved Trial. *Lancet* 2003;**362**:777–781.
- Massie BM, Carson PE, McMurray JJ, Komajda M, McKelvie R, Zile MR, Anderson S, Donovan M, Iverson E, Staiger C, Ptaszynska A. Irbesartan in patients with heart failure and preserved ejection fraction. *N Engl J Med* 2008;**359**:2456–2467.
- Paulus WJ, Tschope C, Sanderson JE, Rusconi C, Flachskampf FA, Rademakers FE, Marino P, Smiseth OA, De Keulenaer G, Leite-Moreira AF, Borbely A, Edes I, Handoko ML, Heymans S, Pezzali N, Pieske B, Dickstein K, Fraser AG, Brutsaert DL. How to diagnose diastolic heart failure: a consensus statement on the diagnosis of heart failure with normal left ventricular ejection fraction by the Heart Failure and Echocardiography Associations of the European Society of Cardiology. *Eur Heart J* 2007;**28**:2539–2550.
- Nagueh SF, Appleton CP, Gillebert TC, Marino PN, Oh JK, Smiseth OA, Waggoner AD, Flachskampf FA, Pellikka PA, Evangelista A. Recommendations for the evaluation of left ventricular diastolic function by echocardiography. *J Am Soc Echocardiogr* 2009;**22**:107–133.
- McMurray JJ, Carson PE, Komajda M, McKelvie R, Zile MR, Ptaszynska A, Staiger C, Donovan JM, Massie BM. Heart failure with preserved ejection fraction: clinical characteristics of 4133 patients enrolled in the I-PRESERVE trial. *Eur J Heart Fail* 2008;**10**:149–156.
- Sanderson JE. Heart failure with a normal ejection fraction. *Heart* 2007;**93**: 155–158.
- McMurray J, Pfeffer MA. New therapeutic options in congestive heart failure: part II. *Circulation* 2002;**105**:2223–2228.
- Davies M, Hobbs F, Davis R, Kenkre J, Roalfe AK, Hare R, Wosornu D, Lancashire RJ. Prevalence of left-ventricular systolic dysfunction and heart failure in the Echocardiographic Heart of England Screening study: a population based study. *Lancet* 2001;**358**:439–444.
- Petrie M, McMurray J. Changes in notions about heart failure. *Lancet* 2001;**358**: 432–434.
- Owan TE, Hodge DO, Herges RM, Jacobsen SJ, Roger VL, Redfield MM. Trends in prevalence and outcome of heart failure with preserved ejection fraction. *N Engl J Med* 2006;**355**:251–259.
- Maeder MT, Kaye DM. Heart failure with normal left ventricular ejection fraction. *J Am Coll Cardiol* 2009;**53**:905–918.
- Paulus WJ, van Ballegoij JJ. Treatment of heart failure with normal ejection fraction: an inconvenient truth! *J Am Coll Cardiol* 2010;**55**:526–537.
- Nishimura RA, Tajik AJ. Evaluation of diastolic filling of left ventricle in health and disease: Doppler echocardiography is the clinician's Rosetta Stone. *J Am Coll Cardiol* 1997;**30**:8–18.
- Mantero A, Gentile F, Gualtierotti C, Azzollini M, Barbieri P, Beretta L, Casazza F, Corno R, Giagnoni E, Lippolis A et al. Left ventricular diastolic parameters in 288 normal subjects from 20 to 80 years old. *Eur Heart J* 1995;**16**:94–105.
- Belardinelli R, Georgiou D, Cianci G, Berman N, Ginzton L, Purcaro A. Exercise training improves left ventricular diastolic filling in patients with dilated cardiomyopathy. Clinical and prognostic implications. *Circulation* 1995;**91**:2775–2784.
- Zile MR, Baicu CF, Gaasch WH. Diastolic heart failure—abnormalities in active relaxation and passive stiffness of the left ventricle. *N Engl J Med* 2004;**350**: 1953–1959.
- Westermann D, Kasner M, Steendijk P, Spillmann F, Riad A, Weitmann K, Hoffmann W, Poller W, Pauschinger M, Schultheiss HP, Tschope C. Role of left ventricular stiffness in heart failure with normal ejection fraction. *Circulation* 2008;**117**:2051–2060.
- Borlaug BA, Nishimura RA, Sorajja P, Lam CS, Redfield MM. Exercise hemodynamics enhance diagnosis of early heart failure with preserved ejection fraction. *Circ Heart Fail* 2010;**11**:2051–2060.
- Yu CM, Lin H, Yang H, Kong SL, Zhang Q, Lee SW. Progression of systolic abnormalities in patients with "isolated" diastolic heart failure and diastolic dysfunction. *Circulation* 2002;**105**:1195–1201.
- Borlaug BA, Lam CS, Roger VL, Rodeheffer RJ, Redfield MM. Contractility and ventricular systolic stiffening in hypertensive heart disease insights into the pathogenesis of heart failure with preserved ejection fraction. *J Am Coll Cardiol* 2009;**54**:410–418.
- Borlaug BA, Melenovsky V, Russell SD, Kessler K, Pacak K, Becker LC, Kass DA. Impaired chronotropic and vasodilator reserves limit exercise capacity in patients with heart failure and a preserved ejection fraction. *Circulation* 2006;**114**:2138–2147.
- Ennezat PV, Lefetz Y, Marechaux S, Six-Carpentier M, Deklunder G, Montaigne D, Bauchart JJ, Mounier-Vehier C, Jude B, Neviere R, Bauters C, Asseman P, de Groote P, Lejemtel TH. Left ventricular abnormal response during dynamic exercise in patients with heart failure and preserved left ventricular ejection fraction at rest. *J Card Fail* 2008;**14**:475–480.
- Borlaug BA, Olson TP, Lam CS, Flood KS, Lerman A, Johnson BD, Redfield MM. Global cardiovascular reserve dysfunction in heart failure with preserved ejection fraction. *J Am Coll Cardiol* 2010;**56**:845–854.
- Phan TT, Abozguia K, Nallur Shivu G, Mahadevan G, Ahmed I, Williams L, Dwivedi G, Patel K, Steendijk P, Ashrafian H, Henning A, Frenneaux M. Heart failure with preserved ejection fraction is characterized by dynamic impairment of active relaxation and contraction of the left ventricle on exercise and associated with myocardial energy deficiency. *J Am Coll Cardiol* 2009;**54**:402–409.
- Tan YT, Wenzelburger F, Lee E, Heatlie G, Leyva F, Patel K, Frenneaux M, Sanderson JE. The pathophysiology of heart failure with normal ejection fraction: exercise echocardiography reveals complex abnormalities of both systolic and diastolic ventricular function involving torsion, untwist, and longitudinal motion. *J Am Coll Cardiol* 2009;**54**:36–46.
- Kawaguchi M, Hay I, Fetis B, Kass DA. Combined ventricular systolic and arterial stiffening in patients with heart failure and preserved ejection fraction: implications for systolic and diastolic reserve limitations. *Circulation* 2003;**107**: 714–720.
- Borlaug BA, Kass DA. Ventricular-vascular interaction in heart failure. *Heart Fail Clin* 2008;**4**:23–36.
- Brubaker PH, Joo KC, Stewart KP, Fray B, Moore B, Kitzman DW. Chronotropic incompetence and its contribution to exercise intolerance in older heart failure patients. *J Cardiopulm Rehabil* 2006;**26**:86–89.
- Kjaergaard J, Akkan D, Iversen KK, Kjoller E, Kober L, Torp-Pedersen C, Hassager C. Prognostic importance of pulmonary hypertension in patients with heart failure. *Am J Cardiol* 2007;**99**:1146–1150.
- Lam CS, Roger VL, Rodeheffer RJ, Borlaug BA, Enders FT, Redfield MM. Pulmonary hypertension in heart failure with preserved ejection fraction: a community-based study. *J Am Coll Cardiol* 2009;**53**:1119–1126.
- Weber KT, Brilla CG, Janicki JS. Myocardial fibrosis: functional significance and regulatory factors. *Cardiovasc Res* 1993;**27**:341–348.

42. Querejeta R, Varo N, Lopez B, Larman M, Artinano E, Etayo JC, Martinez Ubago JL, Gutierrez-Stampa M, Emparanza JI, Gil MJ, Monreal I, Mindan JP, Diez J. Serum carboxy-terminal propeptide of procollagen type I is a marker of myocardial fibrosis in hypertensive heart disease. *Circulation* 2000; **101**:1729–1735.
43. Lopez B, Gonzalez A, Diez J. Circulating biomarkers of collagen metabolism in cardiac diseases. *Circulation* 2010; **121**:1645–1654.
44. Ahmed SH, Clark LL, Pennington WR, Webb CS, Bonnema DD, Leonardi AH, McClure CD, Spinale FG, Zile MR. Matrix metalloproteinases/tissue inhibitors of metalloproteinases: relationship between changes in proteolytic determinants of matrix composition and structural, functional, and clinical manifestations of hypertensive heart disease. *Circulation* 2006; **113**:2089–2096.
45. Heymans S, Schroen B, Vermeersch P, Milting H, Gao F, Kassner A, Gilljins H, Herijgers P, Flameng W, Carmeliet P, Van de Werf F, Pinto YM, Janssens S. Increased cardiac expression of tissue inhibitor of metalloproteinase-1 and tissue inhibitor of metalloproteinase-2 is related to cardiac fibrosis and dysfunction in the chronic pressure-overloaded human heart. *Circulation* 2005; **112**:1136–1144.
46. Gonzalez A, Lopez B, Querejeta R, Zubillaga E, Echeverria T, Diez J. Filling pressures and collagen metabolism in hypertensive patients with heart failure and normal ejection fraction. *Hypertension* 2010; **55**:1418–1424.
47. Spinale FG, Coker ML, Heung LJ, Bond BR, Gunasinghe HR, Etoh T, Goldberg AT, Zellner JL, Crumbley AJ. A matrix metalloproteinase induction/activation system exists in the human left ventricular myocardium and is upregulated in heart failure. *Circulation* 2000; **102**:1944–1949.
48. van Heerebeek L, Borbely A, Niessen HW, Bronzwaer JG, van der Velden J, Stienen GJ, Linke WA, Laarman GJ, Paulus WJ. Myocardial structure and function differ in systolic and diastolic heart failure. *Circulation* 2006; **113**:1966–1973.
49. Polyakova V, Hein S, Kostin S, Ziegelhoeffer T, Schaper J. Matrix metalloproteinases and their tissue inhibitors in pressure-overloaded human myocardium during heart failure progression. *J Am Coll Cardiol* 2004; **44**:1609–1618.
50. Borbely A, van der Velden J, Papp Z, Bronzwaer JG, Edes I, Stienen GJ, Paulus WJ. Cardiomyocyte stiffness in diastolic heart failure. *Circulation* 2005; **111**:774–781.
51. van Heerebeek L, Hamdani N, Handoko ML, Falcao-Pires I, Musters RJ, Kupreishvili K, Ijsselmuiden AJ, Schalkwijk CG, Bronzwaer JG, Diamant M, Borbely A, van der Velden J, Stienen GJ, Laarman GJ, Niessen HW, Paulus WJ. Diastolic stiffness of the failing diabetic heart: importance of fibrosis, advanced glycation end products, and myocyte resting tension. *Circulation* 2008; **117**:43–51.
52. Chaturvedi RR, Herron T, Simmons R, Shore D, Kumar P, Sethia B, Chua F, Vassiliadis E, Kentish JC. Passive stiffness of myocardium from congenital heart disease and implications for diastole. *Circulation* 2010; **121**:979–988.
53. Bang ML, Centner T, Fornoff F, Geach AJ, Gotthardt M, McNabb M, Witt CC, Labeit D, Gregorio CC, Granzier H, Labeit S. The complete gene sequence of titin, expression of an unusual approximately 700-kDa titin isoform, and its interaction with obscurin identify a novel Z-line to I-band linking system. *Circ Res* 2001; **89**:1065–1072.
54. Neagoe C, Opitz CA, Makarenko I, Linke WA. Gigantic variety: expression patterns of titin isoforms in striated muscles and consequences for myofibrillar passive stiffness. *J Muscle Res Cell Motil* 2003; **24**:175–189.
55. Nagueh SF, Shah G, Wu Y, Torre-Amione G, King NM, Lahmers S, Witt CC, Becker K, Labeit S, Granzier HL. Altered titin expression, myocardial stiffness, and left ventricular function in patients with dilated cardiomyopathy. *Circulation* 2004; **110**:155–162.
56. Makarenko I, Opitz CA, Leake MC, Neagoe C, Kulke M, Gwathmey JK, del Monte F, Hajjar RJ, Linke WA. Passive stiffness changes caused by upregulation of compliant titin isoforms in human dilated cardiomyopathy hearts. *Circ Res* 2004; **95**:708–716.
57. Kruger M, Kotter S, Grutzner A, Lang P, Andresen C, Redfield MM, Butt E, dos Remedios CG, Linke WA. Protein kinase G modulates human myocardial passive stiffness by phosphorylation of the titin springs. *Circ Res* 2009; **104**:87–94.
58. Borbely A, Falcao-Pires I, van Heerebeek L, Hamdani N, Edes I, Gavina C, Leite-Moreira AF, Bronzwaer JG, Papp Z, van der Velden J, Stienen GJ, Paulus WJ. Hypophosphorylation of the stiff N2B titin isoform raises cardiomyocyte resting tension in failing human myocardium. *Circ Res* 2009; **104**:780–786.
59. Hidalgo C, Hudson B, Bogomolovas J, Zhu Y, Anderson B, Greaser M, Labeit S, Granzier H. PKC phosphorylation of titin's PEVK element: a novel and conserved pathway for modulating myocardial stiffness. *Circ Res* 2009; **105**:631–638.
60. Grutzner A, Garcia-Manes S, Kotter S, Badilla CL, Fernandez JM, Linke WA. Modulation of titin-based stiffness by disulfide bonding in the cardiac titin N2-B unique sequence. *Biophys J* 2009; **97**:825–834.
61. Wachter R, Schmidt-Schweda S, Westermann D, Post H, Edelmann F, Kasner M, Luers C, Steendijk P, Hasenfuss G, Tschope C, Pieske B. Blunted frequency-dependent upregulation of cardiac output is related to impaired relaxation in diastolic heart failure. *Eur Heart J* 2009; **30**:3027–3036.
62. Sohn DW, Kim HK, Park JS, Chang HJ, Kim YJ, Zo ZH, Oh BH, Park YB, Choi YS. Hemodynamic effects of tachycardia in patients with relaxation abnormality: abnormal stroke volume response as an overlooked mechanism of dyspnea associated with tachycardia in diastolic heart failure. *J Am Soc Echocardiogr* 2007; **20**:171–176.
63. Ramirez-Correa GA, Murphy AM. Is phospholamban or troponin I the “prima donna” in beta-adrenergic induced lusitropy? *Circ Res* 2007; **101**:326–327.
64. Paulus WJ, Vantrimpont PJ, Shah AM. Acute effects of nitric oxide on left ventricular relaxation and diastolic distensibility in humans: assessment by bicoronary sodium nitroprusside infusion. *Circulation* 1994; **89**:2070–2078.
65. Wilson Tang WH, Tong W, Shrestha K, Wang Z, Levison BS, Delfraino B, Hu B, Troughton RW, Klein AL, Hazen SL. Differential effects of arginine methylation on diastolic dysfunction and disease progression in patients with chronic systolic heart failure. *Eur Heart J* 2008; **29**:2506–2513.
66. Bronzwaer JG, Paulus WJ. Nitric oxide: the missing lusitrope in failing myocardium. *Eur Heart J* 2008; **29**:2453–2455.
67. Silberman GA, Fan TH, Liu H, Jiao Z, Xiao HD, Lovelock JD, Boulden BM, Widder J, Fredd S, Bernstein KE, Wolska BM, Dikalov S, Harrison DG, Dudley SC Jr. Uncoupled cardiac nitric oxide synthase mediates diastolic dysfunction. *Circulation* 2010; **121**:519–528.
68. Smith CS, Bottomley PA, Schulman SP, Gerstenblith G, Weiss RG. Altered creatine kinase adenosine triphosphate kinetics in failing hypertrophied human myocardium. *Circulation* 2006; **114**:1151–1158.
69. Schellings MW, Pinto YM, Heymans S. Matricellular proteins in the heart: possible role during stress and remodeling. *Cardiovasc Res* 2004; **64**:24–31.
70. Schroen B, Heymans S, Sharma U, Blanksteijn WM, Pokharel S, Cleutjens JP, Porter JG, Evelo CT, Duisters R, van Leeuwen RE, Janssens BJ, Debets JJ, Smits JF, Daemen MJ, Crijns HJ, Bornstein P, Pinto YM. Thrombospondin-2 is essential for myocardial matrix integrity: increased expression identifies failure-prone cardiac hypertrophy. *Circ Res* 2004; **95**:515–522.
71. Yip G, Wang M, Zhang Y, Fung JW, Ho PY, Sanderson JE. Left ventricular long axis function in diastolic heart failure is reduced in both diastole and systole: time for a redefinition? *Heart* 2002; **87**:121–125.
72. Brucks S, Little WC, Chao T, Kitzman DW, Wesley-Farrington D, Gandhi S, Shihabi ZK. Contribution of left ventricular diastolic dysfunction to heart failure regardless of ejection fraction. *Am J Cardiol* 2005; **95**:603–606.
73. Fukuta H, Little WC. Contribution of systolic and diastolic abnormalities to heart failure with a normal and a reduced ejection fraction. *Prog Cardiovasc Dis* 2007; **49**:229–240.
74. Wang J, Khoury DS, Yue Y, Torre-Amione G, Nagueh SF. Preserved left ventricular twist and circumferential deformation, but depressed longitudinal and radial deformation in patients with diastolic heart failure. *Eur Heart J* 2008; **29**:1283–1289.
75. Aurigemma GP, Zile MR, Gaasch WH. Contractile behavior of the left ventricle in diastolic heart failure: with emphasis on regional systolic function. *Circulation* 2006; **113**:296–304.
76. Baicu CF, Zile MR, Aurigemma GP, Gaasch WH. Left ventricular systolic performance, function, and contractility in patients with diastolic heart failure. *Circulation* 2005; **111**:2306–2312.
77. Melenovsky V, Borlaug BA, Rosen B, Hay I, Ferruci L, Morell CH, Lakatta EG, Najjar SS, Kass DA. Cardiovascular features of heart failure with preserved ejection fraction vs. nonfailing hypertensive left ventricular hypertrophy in the urban Baltimore community: the role of atrial remodeling/dysfunction. *J Am Coll Cardiol* 2007; **49**:198–207.
78. Hundley WG, Kitzman DW, Morgan TM, Hamilton CA, Darty SN, Stewart KP, Herrington DM, Link KM, Little WC. Cardiac cycle-dependent changes in aortic area and distensibility are reduced in older patients with isolated diastolic heart failure and correlate with exercise intolerance. *J Am Coll Cardiol* 2001; **38**:796–802.
79. Gandhi SK, Powers JC, Nomeir AM, Fowle K, Kitzman DW, Rankin KM, Little WC. The pathogenesis of acute pulmonary edema associated with hypertension. *N Engl J Med* 2001; **344**:17–22.
80. Gillebert TC, Leite-Moreira AF, De Hert SG. Load dependent diastolic dysfunction in heart failure. *Heart Fail Rev* 2000; **5**:345–355.
81. Borlaug BA, Melenovsky V, Redfield MM, Kessler K, Chang HJ, Abraham TP, Kass DA. Impact of arterial load and loading sequence on left ventricular tissue velocities in humans. *J Am Coll Cardiol* 2007; **50**:1570–1577.
82. Chantler PD, Lakatta EG, Najjar SS. Arterial-ventricular coupling: mechanistic insights into cardiovascular performance at rest and during exercise. *J Appl Physiol* 2008; **105**:1342–1351.
83. Chen CH, Nakayama M, Talbot M, Nevo E, Fetis B, Gerstenblith G, Becker LC, Kass DA. Verapamil acutely reduces ventricular-vascular stiffening and improves



- aerobic exercise performance in elderly individuals. *J Am Coll Cardiol* 1999;**33**: 1602–1609.
84. Guazzi M, Samaja M, Arena R, Vicenzi M, Guazzi MD. Long-term use of sildenafil in the therapeutic management of heart failure. *J Am Coll Cardiol* 2007;**50**: 2136–2144.
  85. Clark AL, Poole-Wilson PA, Coats AJ. Exercise limitation in chronic heart failure: central role of the periphery. *J Am Coll Cardiol* 1996;**28**:1092–1102.
  86. Shapiro BP, McGoon MD, Redfield MM. Unexplained pulmonary hypertension in elderly patients. *Chest* 2007;**131**:94–100.
  87. Lam CS, Borlaug BA, Kane GC, Enders FT, Rodeheffer RJ, Redfield MM. Age-associated increases in pulmonary artery systolic pressure in the general population. *Circulation* 2009;**119**:2663–2670.
  88. Bolson BA, Schirger JA, Borlaug BA. Caveat medicus! Pulmonary hypertension in the elderly: a word of caution. *Eur J Heart Fail* 2010;**12**:89–93.
  89. Higginbotham MB, Morris KG, Williams RS, McHale PA, Coleman RE, Cobb FR. Regulation of stroke volume during submaximal and maximal upright exercise in normal man. *Circ Res* 1986;**58**:281–291.
  90. Nonogi H, Hess OM, Ritter M, Krayenbuehl HP. Diastolic properties of the normal left ventricle during supine exercise. *Br Heart J* 1988;**60**:30–38.
  91. Rodeheffer RJ, Gerstenblith G, Becker LC, Fleg JL, Weisfeldt ML, Lakatta EG. Exercise cardiac output is maintained with advancing age in healthy human subjects: cardiac dilatation and increased stroke volume compensate for a diminished heart rate. *Circulation* 1984;**69**:203–213.
  92. Kitzman DW, Higginbotham MB, Cobb FR, Sheikh KH, Sullivan MJ. Exercise intolerance in patients with heart failure and preserved left ventricular systolic function: failure of the Frank-Starling mechanism. *J Am Coll Cardiol* 1991;**17**: 1065–1072.
  93. Dauterman K, Pak PH, Maughan WL, Nussbacher A, Arie S, Liu CP, Kass DA. Contribution of external forces to left ventricular diastolic pressure. Implications for the clinical use of the Starling law. *Ann Intern Med* 1995;**122**:737–742.
  94. Chattopadhyay S, Alamgir MF, Nikitin NP, Rigby AS, Clark AL, Cleland JG. Lack of diastolic reserve in patients with heart failure and normal ejection fraction. *Circ Heart Fail* 2010;**3**:35–43.
  95. Liu C-P, Ting C-T, Lawrence W, Maughan WL, Chang M-S, Kass DA. Diminished contractile response to increased heart rate in intact human left ventricular hypertrophy: systolic vs. diastolic determinants. *Circulation* 1993;**88**(part 1): 1893–1906.
  96. Phan TT, Nallur Shivu G, Abozguia K, Davies C, Nassimzadeh M, Jimenez D, Weaver R, Ahmed I, Frenneaux M. Impaired heart rate recovery and chronotropic incompetence in patients with heart failure with preserved ejection fraction. *Circ Heart Fail* 2010;**3**:29–34.
  97. Colucci WS, Ribeiro JP, Rocco MB, Quigg RJ, Creager MA, Marsh JD, Gauthier DF, Hartley LH. Impaired chronotropic response to exercise in patients with congestive heart failure. Role of post-synaptic beta-receptor desensitization. *Circulation* 1989;**80**:314–323.
  98. How to diagnose diastolic heart failure. European Study Group on Diastolic Heart Failure. *Eur Heart J* 1998;**19**:990–1003.
  99. Vasan RS, Levy D. Defining diastolic heart failure: a call for standardized diagnostic criteria. *Circulation* 2000;**101**:2118–2121.
  100. Yturralde RF, Gaasch WH. Diagnostic criteria for diastolic heart failure. *Prog Cardiovasc Dis* 2005;**47**:314–319.
  101. Lam CS. Heart failure with preserved ejection fraction: invasive solution to diagnostic confusion? *J Am Coll Cardiol* 2010;**55**:1711–1712.
  102. Kasner M, Westermann D, Steendijk P, Gaub R, Wilkenshoff U, Weitmann K, Hoffmann W, Poller W, Schultheiss HP, Pauschinger M, Tschope C. Utility of Doppler echocardiography and tissue Doppler imaging in the estimation of diastolic function in heart failure with normal ejection fraction: a comparative Doppler-conductance catheterization study. *Circulation* 2007;**116**:637–647.
  103. Emery WT, Jadavji I, Choy JB, Lawrance RA. Investigating the European Society of Cardiology Diastology Guidelines in a practical scenario. *Eur J Echocardiogr* 2008;**9**:685–691.
  104. Edelmann F, Schmidt AG, Gelbrich G, Binder L, Herrmann-Lingen C, Halle M, Hasenfuss G, Wachter R, Pieske B. Rationale and design of the 'aldosterone receptor blockade in diastolic heart failure' trial: a double-blind, randomized, placebo-controlled, parallel group study to determine the effects of spironolactone on exercise capacity and diastolic function in patients with symptomatic diastolic heart failure (Aldo-DHF). *Eur J Heart Fail* 2010;**12**:874–882.
  105. Mullens W, Borowski AG, Curtin RJ, Thomas JD, Tang WH. Tissue Doppler imaging in the estimation of intracardiac filling pressure in decompensated patients with advanced systolic heart failure. *Circulation* 2009;**119**:62–70.
  106. Handoko ML, Paulus WJ. Polishing the diastolic dysfunction measurement stick. *Eur J Echocardiogr* 2008;**9**:575–577.
  107. Tschope C, Paulus WJ. Is echocardiographic evaluation of diastolic function useful in determining clinical care? Doppler echocardiography yields dubious estimates of left ventricular diastolic pressures. *Circulation* 2009;**120**:810–820; discussion 820.
  108. Penicka M, Bartunek J, Trakalova H, Hrabakova H, Maruskova M, Karasek J, Kocka V. Heart failure with preserved ejection fraction in outpatients with unexplained dyspnea: a pressure-volume loop analysis. *J Am Coll Cardiol* 2010;**55**: 1701–1710.
  109. Burgess MI, Jenkins C, Sharman JE, Marwick TH. Diastolic stress echocardiography: hemodynamic validation and clinical significance of estimation of ventricular filling pressure with exercise. *J Am Coll Cardiol* 2006;**47**:1891–1900.
  110. Cleland JG, Tendera M, Adams J, Freemantle N, Polonski L, Taylor J. The perindopril in elderly people with chronic heart failure (PEP-CHF) study. *Eur Heart J* 2006;**27**:2338–2345.
  111. SOLVD-Investigators. Effect of enalapril on survival in patients with reduced left ventricular ejection fractions and congestive heart failure. *N Engl J Med* 1991;**325**:293–302.
  112. Granger CB, McMurray JJ, Yusuf S, Held P, Michelson EL, Olofsson B, Ostergren J, Pfeffer MA, Swedberg K. Effects of candesartan in patients with chronic heart failure and reduced left-ventricular systolic function intolerant to angiotensin-converting-enzyme inhibitors: the CHARM-Alternative trial. *Lancet* 2003;**362**:772–776.
  113. Hernandez AF, Hammill BG, O'Connor CM, Schulman KA, Curtis LH, Fonarow GC. Clinical effectiveness of beta-blockers in heart failure: findings from the OPTIMIZE-HF (Organized Program to Initiate Lifesaving Treatment in Hospitalized Patients with Heart Failure) Registry. *J Am Coll Cardiol* 2009;**53**: 184–192.
  114. Fukuta H, Sane DC, Brucks S, Little WC. Statin therapy may be associated with lower mortality in patients with diastolic heart failure: a preliminary report. *Circulation* 2005;**112**:357–363.
  115. Kjekshus J, Apetrei E, Barrios V, Bohm M, Cleland JG, Cornel JH, Dunselman P, Fonseca C, Goudev A, Grande P, Gullestad L, Hjalmarson A, Hradec J, Janosi A, Kamensky G, Komajda M, Korewicki J, Kuusi T, Mach F, Mareev V, McMurray JJ, Ranjith N, Schaefelberger M, Vanhaecke J, van Veldhuisen DJ, Waagstein F, Wedel H, Wikstrand J. Rosuvastatin in older patients with systolic heart failure. *N Engl J Med* 2007;**357**:2248–2261.
  116. Tsai EJ, Kass DA. Cyclic GMP signaling in cardiovascular pathophysiology and therapeutics. *Pharmacol Ther* 2009;**122**:216–238.
  117. Takimoto E, Champion HC, Li M, Belardi D, Ren S, Rodriguez ER, Bedja D, Gabrielson KL, Wang Y, Kass DA. Chronic inhibition of cyclic GMP phosphodiesterase 5A prevents and reverses cardiac hypertrophy. *Nat Med* 2005;**11**:214–222.
  118. Borlaug BA, Melenovsky V, Marhin T, Fitzgerald P, Kass DA. Sildenafil inhibits beta-adrenergic-stimulated cardiac contractility in humans. *Circulation* 2005;**112**:2642–2649.
  119. Vlachopoulos C, Hirata K, O'Rourke MF. Effect of sildenafil on arterial stiffness and wave reflection. *Vasc Med* 2003;**8**:243–248.
  120. Katz SD, Balidemaj K, Homma S, Wu H, Wang J, Maybaum S. Acute type 5 phosphodiesterase inhibition with sildenafil enhances flow-mediated vasodilation in patients with chronic heart failure. *J Am Coll Cardiol* 2000;**36**:845–851.
  121. Lewis GD, Lachmann J, Camuso J, Lepore JJ, Shin J, Martinovic ME, Systrom DM, Bloch KD, Semigran MJ. Sildenafil improves exercise hemodynamics and oxygen uptake in patients with systolic heart failure. *Circulation* 2007;**115**:59–66.
  122. Chen HH. Heart failure: a state of brain natriuretic peptide deficiency or resistance or both! *J Am Coll Cardiol* 2007;**49**:1089–1091.
  123. Redfield MM, Lee KL, Braunwald E. Evaluating the effectiveness of Sildenafil at improving health outcomes and exercise ability in people with diastolic heart failure (The RELAX Study). [www.clinicaltrials.gov](http://www.clinicaltrials.gov) 2008; registration number NCT00763867.
  124. Moens AL, Takimoto E, Tocchetti CG, Chakir K, Bedja D, Cormaci G, Ketner EA, Majmudar M, Gabrielson K, Halushka MK, Mitchell JB, Biswal S, Channon KM, Wolin MS, Alp NJ, Paolucci N, Champion HC, Kass DA. Reversal of cardiac hypertrophy and fibrosis from pressure overload by tetrahydrobiopterin: efficacy of recoupling nitric oxide synthase as a therapeutic strategy. *Circulation* 2008;**117**:2626–2636.
  125. Clarkson PB, Wheelton NM, MacFadyen RJ, Pringle SD, MacDonald TM. Effects of brain natriuretic peptide on exercise hemodynamics and neurohormones in isolated diastolic heart failure. *Circulation* 1996;**93**:2037–2042.
  126. McCallister BD, Yipintsoi T, Hallermann FJ, Wallace RB, Frye RL. Left ventricular performance during mild supine leg exercise in coronary artery disease. *Circulation* 1968;**37**:922–931.
  127. Weber KT. Aldosterone in congestive heart failure. *N Engl J Med* 2001;**345**: 1689–1697.
  128. Daniel KR, Wells G, Stewart K, Moore B, Kitzman DW. Effect of aldosterone antagonism on exercise tolerance, Doppler diastolic function, and quality of life in older women with diastolic heart failure. *Congest Heart Fail* 2009;**15**: 68–74.



129. Lai A, Frishman WH. Rho-kinase inhibition in the therapy of cardiovascular disease. *Cardiol Rev* 2005;**13**:285–292.
130. Little WC, Brucks S. Therapy for diastolic heart failure. *Prog Cardiovasc Dis* 2005;**47**:380–388.
131. Kass DA, Kitzman DW, Alvarez GE. The Restoration of chronotropic competence in heart failure patients with normal Ejection fraction (RESET) study: rationale and design. *J Cardiac Fail* 2010;**16**:17–24.
132. McCaffrey DJ, McDonald K. If channel blockade with ivabradine in patients with diastolic heart failure. [www.clinicaltrials.gov](http://www.clinicaltrials.gov) 2008; NCT00757055.
133. van Veldhuisen DJ, Cohen-Solal A, Bohm M, Anker SD, Babalis D, Roughton M, Coats AJ, Poole-Wilson PA, Flather MD. Beta-blockade with nebivolol in elderly heart failure patients with impaired and preserved left ventricular ejection fraction: Data From SENIORS (Study of Effects of Nebivolol Intervention on Outcomes and Rehospitalization in Seniors With Heart Failure). *J Am Coll Cardiol* 2009;**53**:2150–2158.
134. Olshansky B, Sabbah HN, Hauptman PJ, Colucci WS. Parasympathetic nervous system and heart failure: pathophysiology and potential implications for therapy. *Circulation* 2008;**118**:863–871.
135. Wang J, Kurrelmeyer KM, Torre-Amione G, Nagueh SF. Systolic and diastolic dyssynchrony in patients with diastolic heart failure and the effect of medical therapy. *J Am Coll Cardiol* 2007;**49**:88–96.
136. Senni M, Tribouilloy CM, Rodeheffer RJ, Jacobsen SJ, Evans JM, Bailey KR, Redfield MM. Congestive heart failure in the community: a study of all incident cases in Olmsted County, Minnesota, in 1991. *Circulation* 1998;**98**:2282–2289.
137. Lee DS, Gona P, Vasan RS, Larson MG, Benjamin EJ, Wang TJ, Tu JV, Levy D. Relation of disease pathogenesis and risk factors to heart failure with preserved or reduced ejection fraction: insights from the Framingham heart study of the national heart, lung, and blood institute. *Circulation* 2009;**119**:3070–3077.
138. Wu Y, Cazorla O, Labeit D, Labeit S, Granzier H. Changes in titin and collagen underlie diastolic stiffness diversity of cardiac muscle. *J Mol Cell Cardiol* 2000;**32**:2151–2162.
139. Neagoe C, Kulke M, del Monte F, Gwathmey JK, de Tombe PP, Hajjar RJ, Linke WA. Titin isoform switch in ischemic human heart disease. *Circulation* 2002;**106**:1333–1341.
140. Vaitkevicius PV, Lane M, Spurgeon H, Ingram DK, Roth GS, Egan JJ, Vasan S, Wagle DR, Ulrich P, Brines M, Wueth JP, Cerami A, Lakatta EG. A cross-link breaker has sustained effects on arterial and ventricular properties in older rhesus monkeys. *Proc Natl Acad Sci USA* 2001;**98**:1171–1175.
141. Kass DA, Shapiro EP, Kawaguchi M, Capriotti AR, Scuteri A, deGroof RC, Lakatta EG. Improved arterial compliance by a novel advanced glycation end-product crosslink breaker. *Circulation* 2001;**104**:1464–1470.
142. Little WC, Zile MR, Kitzman DW, Hundley WG, O'Brien TX, Degroff RC. The effect of alagebrium chloride (ALT-711), a novel glucose cross-link breaker, in the treatment of elderly patients with diastolic heart failure. *J Cardiac Fail* 2005;**11**:191–195.
143. Kuwahara F, Kai H, Tokuda K, Kai M, Takeshita A, Egashira K, Imaizumi T. Transforming growth factor-beta function blocking prevents myocardial fibrosis and diastolic dysfunction in pressure-overloaded rats. *Circulation* 2002;**106**:130–135.
144. Moreo A, Ambrosio G, De Chiara B, Pu M, Tran T, Mauri F, Raman SV. Influence of myocardial fibrosis on left ventricular diastolic function: noninvasive assessment by cardiac magnetic resonance and echo. *Circ Cardiovasc Imaging* 2009;**2**:437–443.
145. Frenneaux M. Perhexiline therapy in heart failure with preserved ejection fraction syndrome. [www.clinicaltrials.gov](http://www.clinicaltrials.gov) 2009; NCT00839228.
146. Sossalla S, Wagner S, Rasenack EC, Ruff H, Weber SL, Schondube FA, Tirilomis T, Tenderich G, Hasenfuss G, Belardinelli L, Maier LS. Ranolazine improves diastolic dysfunction in isolated myocardium from failing human hearts—role of late sodium current and intracellular ion accumulation. *J Mol Cell Cardiol* 2008;**45**:32–43.
